# Supplementary material for: A network of epigenetic modifiers and DNA repair genes controls tissue-specific copy number alteration preference
Source: eLife journal article supplement (doi:10.7554/elife.16519), 2016-11-10
Supplement: supp [file elife_poa_e16519_Supplementary_File_1.xls]

## Sheet: Table S1
Supplementary Table 1. All CONIM proteins.
Gene name	pan cancer q value	Log ratio CNA amount in mutated versus non-mutated samples	ATM-dependent DNA repair	GO terms epigenetic involvement	Number of pipelines in which gene can be reproduced
ADGRL1	0.00189982	-0.906891			1
AK9	0.0078506	-0.807355			1
AP2A2	0.00708807	-1.11103			1
AQR	0.00634078	-0.887525			1
ARFGEF1	0.000816822	-0.874469			2
ARHGAP21	0.000816822	-0.874469			1
ARHGEF15	0.00210601	-0.95109			1
ARID1A	1.21088e-09	-0.719892		chromosome organization	4
ATRX	0.000322019	-0.584963		chromosome organization, DNA methylation	2
BCL9L	0.003143	-1.08489			1
BMPR2	0.000171405	-1.08746			2
BRAF	3.36193e-53	-2.04439			2
CASP8	2.21118e-07	-0.978626			3
CDH1	3.13607e-09	-1			3
CIC	1.3376e-13	-1.38333			2
CTCF	5.7317e-13	-1.95936		chromosome organization, DNA methylation	2
CTNNB1	1.17553e-10	-1.09954	yes	chromosome organization, histone modification	2
DCTN1	0.00652032	-0.770518			1
DLEC1	0.00671275	-0.678072			1
DYRK3	0.00371398	-0.947533			1
ELMSAN1	0.000484075	-0.857981			2
EP400	0.00950192	-0.561879		chromosome organization, histone modification	1
FLNB	0.000816822	-0.678072			1
GALNT16	0.00249239	-1.26303			1
GIGYF2	0.000593658	-1			1
GPRASP1	0.00885188	-0.830075			1
HDAC4	0.000857219	-1.08246		chromosome organization, histone modification	1
ITGB4	0.00390116	-0.839535			1
KANSL1	0.0010518	-0.95818		chromosome organization, histone modification	1
KRAS	4.3893e-10	-0.752072	yes		3
LARP4B	0.00851423	-0.921997			1
LENG8	0.00955253	-1			1
MAP3K1	3.2294e-08	-1.16993	yes		3
MYO1D	0.00481054	-0.955606			1
NIPBL	0.00950192	-0.752072		chromosome organization, histone modification	1
NLRP9	0.00473756	-0.695145			1
PBRM1	1.9842e-10	-1.25376		chromosome organization	2
PIK3CA	1.52282e-08	-0.514573	yes	DNA methylation	3
PIK3R1	1.99291e-08	-1.14684	yes		1
PLXNB1	0.00671275	-0.736966			1
PTEN	9.95776e-22	-1.09954	yes	chromosome organization	4
PTPN23	0.00660037	-1			1
PTPRG	0.00220589	-0.839535			2
PTPRU	0.00912634	-0.777608			1
RAD50	0.00671275	-1.44361		chromosome organization	1
RBM25	0.000527459	-1.32193			2
RNF43	3.68288e-06	-0.903785			2
SETD2	0.00483251	-0.736966		chromosome organization, histone modification	1
SLK	0.00174247	-1.09311			1
SMC1A	0.00749944	-1.36923		chromosome organization	1
SYCP1	0.00555581	-0.807355		chromosome organization	1
TCERG1	0.0010518	-0.915111			1
TCF20	0.00326085	-0.632268			1
TEK	0.00152781	-0.736966			2
TNRC6A	0.000208287	-0.857981			1
TP53	7.39946e-125	1.24393	yes	chromosome organization, histone modification	4
TSGA10	0.00515873	-0.917538			1
UHRF1BP1	0.00252832	-0.706269			1
WWC3	0.00800349	-0.839535			1
YLPM1	9.99395e-05	-0.830075		chromosome organization	1
ZC3H18	0.00686362	-1			1
ZNF862	0.00812486	-1.08746			1
ZNF878	0.0014159	-1.06413			1

## Sheet: Table S2
Supplementary Table 2. Association of cancer types to tissues of origin.
cancer type	# breakpoints	tissue	tissue ID	selected epigenome	Chromatin	H3K9me3
BRCA	89	HMEC Mammary Epithelial Primary Cells	E119	yes	✓	✓
COAD	83	Colonic Mucosa	E075	yes	✓	✓
ESCA	118	Esophagus	E079	yes	✓	✓
GBM	107	NH-A Astrocytes Primary Cells	E125	yes	✓	✓
LAML	29	Primary hematopoietic stem cells	E035	yes		✓
LIHC	81	Liver	E066	yes	✓	✓
LUAD	87	Lung	E096	yes	✓	✓
LUSC	111	Lung	E096	yes	✓	✓
OV	84	Ovary	E097	yes	✓	✓
READ	80	Rectal Mucosa Donor 29	E101	yes	✓	✓
SKCM	69	Foreskin Melanocyte Primary Cells skin03	E061	yes	✓	✓
STAD	134	Stomach Mucosa	E110	yes		✓
THYM	9	Thymus	E112	yes	✓	✓
BRCA	89	Breast variant Human Mammary Epithelial Cells (vHMEC)	E028	no		✓
COAD	83	Sigmoid Colon	E106	no	✓	✓
GBM	107	Cortex derived primary cultured neurospheres	E053	no		✓
GBM	107	Ganglion Eminence derived primary cultured neurospheres	E054	no		✓
READ	80	Rectal Mucosa Donor 31	E102	no	✓	✓
SKCM	69	Foreskin Melanocyte Primary Cells skin01	E059	no	✓	✓
STAD	134	Gastric	E094	no	not used since data for E110 is missing	✓
