# Supplementary material for: A network of epigenetic modifiers and DNA repair genes controls tissue-specific copy number alteration preference
Source: eLife. 2016 Nov 10;5:e16519. doi: 10.7554/eLife.16519 (PMC5122459; doi:10.7554/eLife.16519)
Supplement: Supplementary file 2. — DOI: http://dx.doi.org/10.7554/eLife.16519.014 [file elife-16519-supp2.xls]

## Sheet: Sheet1
Author(s)	Year	Dataset Title	Dataset URL and Accession number
Kundaje, A. et al.	2015	Chromatin state model (18 states)	http://egg2.wustl.edu/roadmap/data/byFileType/chromhmmSegmentations/ChmmModels/core_K27ac/jointModel/final/all.mnemonics.bedFiles.tgz
Kundaje, A. et al.	2015	Histone ChIP-seq peaks	http://egg2.wustl.edu/roadmap/data/byFileType/peaks/consolidated/narrowPeak/
Kundaje, A. et al.	2015	RNA expression (RNAseq)	http://egg2.wustl.edu/roadmap/data/byDataType/rna/expression/57epigenomes.RPKM.pc.gz
Schaefer, M. et al.	2012	HIPPIE protein-protein interactions	http://cbdm-01.zdv.uni-mainz.de/~mschaefer/hippie/hippie_v1_8.txt
Broad Institute TCGA Genome Data Analysis Center	2014	SNP6 focal copy altered segments	http://gdac.broadinstitute.org/runs/analyses__2014_10_17/data/BLCA/20141017/gdac.broadinstitute.org_BLCA-TP.CopyNumber_Gistic2.Level_4.2014101700.0.0.tar.gz
Broad Institute TCGA Genome Data Analysis Center	2014	SNP6 focal copy altered segments	http://gdac.broadinstitute.org/runs/analyses__2014_10_17/data/BRCA/20141017/gdac.broadinstitute.org_BRCA-TP.CopyNumber_Gistic2.Level_4.2014101700.0.0.tar.gz
Broad Institute TCGA Genome Data Analysis Center	2014	SNP6 focal copy altered segments	http://gdac.broadinstitute.org/runs/analyses__2014_10_17/data/CESC/20141017/gdac.broadinstitute.org_CESC-TP.CopyNumber_Gistic2.Level_4.2014101700.0.0.tar.gz
Broad Institute TCGA Genome Data Analysis Center	2014	SNP6 focal copy altered segments	http://gdac.broadinstitute.org/runs/analyses__2014_10_17/data/COAD/20141017/gdac.broadinstitute.org_COAD-TP.CopyNumber_Gistic2.Level_4.2014101700.0.0.tar.gz
Broad Institute TCGA Genome Data Analysis Center	2014	SNP6 focal copy altered segments	http://gdac.broadinstitute.org/runs/analyses__2014_10_17/data/GBM/20141017/gdac.broadinstitute.org_GBM-TP.CopyNumber_Gistic2.Level_4.2014101700.0.0.tar.gz
Broad Institute TCGA Genome Data Analysis Center	2014	SNP6 focal copy altered segments	http://gdac.broadinstitute.org/runs/analyses__2014_10_17/data/HNSC/20141017/gdac.broadinstitute.org_HNSC-TP.CopyNumber_Gistic2.Level_4.2014101700.0.0.tar.gz
Broad Institute TCGA Genome Data Analysis Center	2014	SNP6 focal copy altered segments	http://gdac.broadinstitute.org/runs/analyses__2014_10_17/data/KIRC/20141017/gdac.broadinstitute.org_KIRC-TP.CopyNumber_Gistic2.Level_4.2014101700.0.0.tar.gz
Broad Institute TCGA Genome Data Analysis Center	2014	SNP6 focal copy altered segments	http://gdac.broadinstitute.org/runs/analyses__2014_10_17/data/KIRP/20141017/gdac.broadinstitute.org_KIRP-TP.CopyNumber_Gistic2.Level_4.2014101700.0.0.tar.gz
Broad Institute TCGA Genome Data Analysis Center	2014	SNP6 focal copy altered segments	http://gdac.broadinstitute.org/runs/analyses__2014_10_17/data/LAML/20141017/gdac.broadinstitute.org_LAML-TB.CopyNumber_Gistic2.Level_4.2014101700.0.0.tar.gz
Broad Institute TCGA Genome Data Analysis Center	2014	SNP6 focal copy altered segments	http://gdac.broadinstitute.org/runs/analyses__2014_10_17/data/LGG/20141017/gdac.broadinstitute.org_LGG-TP.CopyNumber_Gistic2.Level_4.2014101700.0.0.tar.gz
Broad Institute TCGA Genome Data Analysis Center	2014	SNP6 focal copy altered segments	http://gdac.broadinstitute.org/runs/analyses__2014_10_17/data/LIHC/20141017/gdac.broadinstitute.org_LIHC-TP.CopyNumber_Gistic2.Level_4.2014101700.0.0.tar.gz
Broad Institute TCGA Genome Data Analysis Center	2014	SNP6 focal copy altered segments	http://gdac.broadinstitute.org/runs/analyses__2014_10_17/data/LUAD/20141017/gdac.broadinstitute.org_LUAD-TP.CopyNumber_Gistic2.Level_4.2014101700.0.0.tar.gz
Broad Institute TCGA Genome Data Analysis Center	2014	SNP6 focal copy altered segments	http://gdac.broadinstitute.org/runs/analyses__2014_10_17/data/LUSC/20141017/gdac.broadinstitute.org_LUSC-TP.CopyNumber_Gistic2.Level_4.2014101700.0.0.tar.gz
Broad Institute TCGA Genome Data Analysis Center	2014	SNP6 focal copy altered segments	http://gdac.broadinstitute.org/runs/analyses__2014_10_17/data/PAAD/20141017/gdac.broadinstitute.org_PAAD-TP.CopyNumber_Gistic2.Level_4.2014101700.0.0.tar.gz
Broad Institute TCGA Genome Data Analysis Center	2014	SNP6 focal copy altered segments	http://gdac.broadinstitute.org/runs/analyses__2014_10_17/data/PCPG/20141017/gdac.broadinstitute.org_PAAD-TP.CopyNumber_Gistic2.Level_4.2014101700.0.0.tar.gz
Broad Institute TCGA Genome Data Analysis Center	2014	SNP6 focal copy altered segments	http://gdac.broadinstitute.org/runs/analyses__2014_10_17/data/PRAD/20141017/gdac.broadinstitute.org_PRAD-TP.CopyNumber_Gistic2.Level_4.2014101700.0.0.tar.gz
Broad Institute TCGA Genome Data Analysis Center	2014	SNP6 focal copy altered segments	http://gdac.broadinstitute.org/runs/analyses__2014_10_17/data/SKCM/20141017/gdac.broadinstitute.org_SKCM-TM.CopyNumber_Gistic2.Level_4.2014101700.0.0.tar.gz
Broad Institute TCGA Genome Data Analysis Center	2014	SNP6 focal copy altered segments	http://gdac.broadinstitute.org/runs/analyses__2014_10_17/data/STAD/20141017/gdac.broadinstitute.org_STAD-TP.CopyNumber_Gistic2.Level_4.2014101700.0.0.tar.gz
Broad Institute TCGA Genome Data Analysis Center	2014	SNP6 focal copy altered segments	http://gdac.broadinstitute.org/runs/analyses__2014_10_17/data/THCA/20141017/gdac.broadinstitute.org_THCA-TP.CopyNumber_Gistic2.Level_4.2014101700.0.0.tar.gz
Broad Institute TCGA Genome Data Analysis Center	2014	SNP6 focal copy altered segments	http://gdac.broadinstitute.org/runs/analyses__2014_10_17/data/UCEC/20141017/gdac.broadinstitute.org_UCEC-TP.CopyNumber_Gistic2.Level_4.2014101700.0.0.tar.gz
Broad Institute TCGA Genome Data Analysis Center	2015	Illumina HiSeq copy number data	http://gdac.broadinstitute.org/runs/stddata__2015_08_21/data/LGG/20150821/gdac.broadinstitute.org_LGG.Merge_cna__illuminahiseq_dnaseqc__hms_harvard_edu__Level_3__segmentation__seg.Level_3.2015082100.0.0.tar.gz
Broad Institute TCGA Genome Data Analysis Center	2015	Illumina HiSeq copy number data	http://gdac.broadinstitute.org/runs/stddata__2015_08_21/data/CESC/20150821/gdac.broadinstitute.org_CESC.Merge_cna__illuminahiseq_dnaseqc__hms_harvard_edu__Level_3__segmentation__seg.Level_3.2015082100.0.0.tar.gz
Broad Institute TCGA Genome Data Analysis Center	2015	Illumina HiSeq copy number data	http://gdac.broadinstitute.org/runs/stddata__2015_08_21/data/COAD/20150821/gdac.broadinstitute.org_COAD.Merge_cna__illuminahiseq_dnaseqc__hms_harvard_edu__Level_3__segmentation__seg.Level_3.2015082100.0.0.tar.gz
Broad Institute TCGA Genome Data Analysis Center	2015	Illumina HiSeq copy number data	http://gdac.broadinstitute.org/runs/stddata__2015_08_21/data/HNSC/20150821/gdac.broadinstitute.org_HNSC.Merge_cna__illuminahiseq_dnaseqc__hms_harvard_edu__Level_3__segmentation__seg.Level_3.2015082100.0.0.tar.gz
Broad Institute TCGA Genome Data Analysis Center	2015	Illumina HiSeq copy number data	http://gdac.broadinstitute.org/runs/stddata__2015_08_21/data/HNSC/20150821/gdac.broadinstitute.org_HNSC.Merge_cna__illuminahiseq_dnaseqc__hms_harvard_edu__Level_3__segmentation__seg.Level_3.2015082100.0.0.tar.gz
Broad Institute TCGA Genome Data Analysis Center	2015	Illumina HiSeq copy number data	http://gdac.broadinstitute.org/runs/stddata__2015_08_21/data/PRAD/20150821/gdac.broadinstitute.org_PRAD.Merge_cna__illuminahiseq_dnaseqc__hms_harvard_edu__Level_3__segmentation__seg.Level_3.2015082100.0.0.tar.gz
Broad Institute TCGA Genome Data Analysis Center	2015	Illumina HiSeq copy number data	http://gdac.broadinstitute.org/runs/stddata__2015_08_21/data/SKCM/20150821/gdac.broadinstitute.org_SKCM.Merge_cna__illuminahiseq_dnaseqc__hms_harvard_edu__Level_3__segmentation__seg.Level_3.2015082100.0.0.tar.gz
Broad Institute TCGA Genome Data Analysis Center	2015	Illumina HiSeq copy number data	http://gdac.broadinstitute.org/runs/stddata__2015_08_21/data/STAD/20150821/gdac.broadinstitute.org_STAD.Merge_cna__illuminahiseq_dnaseqc__hms_harvard_edu__Level_3__segmentation__seg.Level_3.2015082100.0.0.tar.gz
Broad Institute TCGA Genome Data Analysis Center	2015	Illumina HiSeq copy number data	http://gdac.broadinstitute.org/runs/stddata__2015_08_21/data/THCA/20150821/gdac.broadinstitute.org_THCA.Merge_cna__illuminahiseq_dnaseqc__hms_harvard_edu__Level_3__segmentation__seg.Level_3.2015082100.0.0.tar.gz
Broad Institute TCGA Genome Data Analysis Center	2015	Illumina HiSeq copy number data	http://gdac.broadinstitute.org/runs/stddata__2015_08_21/data/UCEC/20150821/gdac.broadinstitute.org_UCEC.Merge_cna__illuminahiseq_dnaseqc__hms_harvard_edu__Level_3__segmentation__seg.Level_3.2015082100.0.0.tar.gz
Broad Institute TCGA Genome Data Analysis Center	2015	SNP6 recurrent copy number alterations (GISTIC2)	http://gdac.broadinstitute.org/runs/analyses__2015_04_02/data/BRCA-TP/20150402/gdac.broadinstitute.org_BRCA-TP.CopyNumber_Gistic2.Level_4.2015040200.0.0.tar.gz
Broad Institute TCGA Genome Data Analysis Center	2015	SNP6 recurrent copy number alterations (GISTIC2)	http://gdac.broadinstitute.org/runs/analyses__2015_04_02/data/COAD-TP/20150402/gdac.broadinstitute.org_COAD-TP.CopyNumber_Gistic2.Level_4.2015040200.0.0.tar.gz
Broad Institute TCGA Genome Data Analysis Center	2015	SNP6 recurrent copy number alterations (GISTIC2)	http://gdac.broadinstitute.org/runs/analyses__2015_08_21/data/ESCA-TP/20150821/gdac.broadinstitute.org_ESCA-TP.CopyNumber_Gistic2.Level_4.2015082100.0.0.tar.gz
Broad Institute TCGA Genome Data Analysis Center	2015	SNP6 recurrent copy number alterations (GISTIC2)	http://gdac.broadinstitute.org/runs/analyses__2015_04_02/data/GBM-TP/20150402/gdac.broadinstitute.org_GBM-TP.CopyNumber_Gistic2.Level_4.2015040200.0.0.tar.gz
Broad Institute TCGA Genome Data Analysis Center	2015	SNP6 recurrent copy number alterations (GISTIC2)	http://gdac.broadinstitute.org/runs/analyses__2015_04_02/data/LAML-TB/20150402/gdac.broadinstitute.org_LAML-TB.CopyNumber_Gistic2.Level_4.2015040200.0.0.tar.gz
Broad Institute TCGA Genome Data Analysis Center	2015	SNP6 recurrent copy number alterations (GISTIC2)	http://gdac.broadinstitute.org/runs/analyses__2015_04_02/data/LIHC-TP/20150402/gdac.broadinstitute.org_LIHC-TP.CopyNumber_Gistic2.Level_4.2015040200.0.0.tar.gz
Broad Institute TCGA Genome Data Analysis Center	2015	SNP6 recurrent copy number alterations (GISTIC2)	http://gdac.broadinstitute.org/runs/analyses__2015_04_02/data/LUAD-TP/20150402/gdac.broadinstitute.org_LUAD-TP.CopyNumber_Gistic2.Level_4.2015040200.0.0.tar.gz
Broad Institute TCGA Genome Data Analysis Center	2015	SNP6 recurrent copy number alterations (GISTIC2)	http://gdac.broadinstitute.org/runs/analyses__2015_04_02/data/LUSC-TP/20150402/gdac.broadinstitute.org_LUSC-TP.CopyNumber_Gistic2.Level_4.2015040200.0.0.tar.gz
Broad Institute TCGA Genome Data Analysis Center	2015	SNP6 recurrent copy number alterations (GISTIC2)	http://gdac.broadinstitute.org/runs/analyses__2015_04_02/data/OV-TP/20150402/gdac.broadinstitute.org_OV-TP.CopyNumber_Gistic2.Level_4.2015040200.0.0.tar.gz
Broad Institute TCGA Genome Data Analysis Center	2015	SNP6 recurrent copy number alterations (GISTIC2)	http://gdac.broadinstitute.org/runs/analyses__2015_04_02/data/READ-TP/20150402/gdac.broadinstitute.org_READ-TP.CopyNumber_Gistic2.Level_4.2015040200.0.0.tar.gz
Broad Institute TCGA Genome Data Analysis Center	2015	SNP6 recurrent copy number alterations (GISTIC2)	http://gdac.broadinstitute.org/runs/analyses__2015_04_02/data/SKCM-TM/20150402/gdac.broadinstitute.org_SKCM-TM.CopyNumber_Gistic2.Level_4.2015040200.0.0.tar.gz
Broad Institute TCGA Genome Data Analysis Center	2015	SNP6 recurrent copy number alterations (GISTIC2)	http://gdac.broadinstitute.org/runs/analyses__2015_04_02/data/STAD-TP/20150402/gdac.broadinstitute.org_STAD-TP.CopyNumber_Gistic2.Level_4.2015040200.0.0.tar.gz
Broad Institute TCGA Genome Data Analysis Center	2015	SNP6 recurrent copy number alterations (GISTIC2)	http://gdac.broadinstitute.org/runs/analyses__2015_04_02/data/THYM-TP/20150402/gdac.broadinstitute.org_THYM-TP.CopyNumber_Gistic2.Level_4.2015040200.0.0.tar.gz
Broad Institute TCGA Genome Data Analysis Center	2014	Mutation data	http://gdac.broadinstitute.org/runs/stddata__2014_07_15/data/BRCA/20140715/gdac.broadinstitute.org_BRCA.Mutation_Packager_Calls.Level_3.2014071500.0.0.tar.gz
Broad Institute TCGA Genome Data Analysis Center	2014	Mutation data	http://gdac.broadinstitute.org/runs/stddata__2014_07_15/data/CESC/20140715/gdac.broadinstitute.org_CESC.Mutation_Packager_Calls.Level_3.2014071500.0.0.tar.gz
Broad Institute TCGA Genome Data Analysis Center	2014	Mutation data	http://gdac.broadinstitute.org/runs/stddata__2014_07_15/data/COAD/20140715/gdac.broadinstitute.org_COAD.Mutation_Packager_Calls.Level_3.2014071500.0.0.tar.gz
Broad Institute TCGA Genome Data Analysis Center	2014	Mutation data	http://gdac.broadinstitute.org/runs/stddata__2014_07_15/data/GBM/20140715/gdac.broadinstitute.org_GBM.Mutation_Packager_Calls.Level_3.2014071500.0.0.tar.gz
Broad Institute TCGA Genome Data Analysis Center	2014	Mutation data	http://gdac.broadinstitute.org/runs/stddata__2014_07_15/data/HNSC/20140715/gdac.broadinstitute.org_HNSC.Mutation_Packager_Calls.Level_3.2014071500.0.0.tar.gz
Broad Institute TCGA Genome Data Analysis Center	2014	Mutation data	http://gdac.broadinstitute.org/runs/stddata__2014_07_15/data/KIRC/20140715/gdac.broadinstitute.org_KIRC.Mutation_Packager_Calls.Level_3.2014071500.0.0.tar.gz
Broad Institute TCGA Genome Data Analysis Center	2014	Mutation data	http://gdac.broadinstitute.org/runs/stddata__2014_07_15/data/KIRP/20140715/gdac.broadinstitute.org_KIRP.Mutation_Packager_Calls.Level_3.2014071500.0.0.tar.gz
Broad Institute TCGA Genome Data Analysis Center	2014	Mutation data	http://gdac.broadinstitute.org/runs/stddata__2014_07_15/data/LAML/20140715/gdac.broadinstitute.org_LAML.Mutation_Packager_Calls.Level_3.2014071500.0.0.tar.gz
Broad Institute TCGA Genome Data Analysis Center	2014	Mutation data	http://gdac.broadinstitute.org/runs/stddata__2014_07_15/data/LGG/20140715/gdac.broadinstitute.org_LGG.Mutation_Packager_Calls.Level_3.2014071500.0.0.tar.gz
Broad Institute TCGA Genome Data Analysis Center	2014	Mutation data	http://gdac.broadinstitute.org/runs/stddata__2014_07_15/data/LIHC/20140715/gdac.broadinstitute.org_LIHC.Mutation_Packager_Calls.Level_3.2014071500.0.0.tar.gz
Broad Institute TCGA Genome Data Analysis Center	2014	Mutation data	http://gdac.broadinstitute.org/runs/stddata__2014_07_15/data/LUAD/20140715/gdac.broadinstitute.org_LUAD.Mutation_Packager_Calls.Level_3.2014071500.0.0.tar.gz
Broad Institute TCGA Genome Data Analysis Center	2014	Mutation data	http://gdac.broadinstitute.org/runs/stddata__2014_07_15/data/LUSC/20140715/gdac.broadinstitute.org_LUSC.Mutation_Packager_Calls.Level_3.2014071500.0.0.tar.gz
Broad Institute TCGA Genome Data Analysis Center	2014	Mutation data	http://gdac.broadinstitute.org/runs/stddata__2014_07_15/data/PAAD/20140715/gdac.broadinstitute.org_PAAD.Mutation_Packager_Calls.Level_3.2014071500.0.0.tar.gz
Broad Institute TCGA Genome Data Analysis Center	2014	Mutation data	http://gdac.broadinstitute.org/runs/stddata__2014_07_15/data/PCPG/20140715/gdac.broadinstitute.org_PCPG.Mutation_Packager_Calls.Level_3.2014071500.0.0.tar.gz
Broad Institute TCGA Genome Data Analysis Center	2014	Mutation data	http://gdac.broadinstitute.org/runs/stddata__2014_07_15/data/PRAD/20140715/gdac.broadinstitute.org_PRAD.Mutation_Packager_Calls.Level_3.2014071500.0.0.tar.gz
Broad Institute TCGA Genome Data Analysis Center	2014	Mutation data	http://gdac.broadinstitute.org/runs/stddata__2014_07_15/data/SKCM/20140715/gdac.broadinstitute.org_SKCM.Mutation_Packager_Calls.Level_3.2014071500.0.0.tar.gz
Broad Institute TCGA Genome Data Analysis Center	2014	Mutation data	http://gdac.broadinstitute.org/runs/stddata__2014_07_15/data/STAD/20140715/gdac.broadinstitute.org_STAD.Mutation_Packager_Calls.Level_3.2014071500.0.0.tar.gz
Broad Institute TCGA Genome Data Analysis Center	2014	Mutation data	http://gdac.broadinstitute.org/runs/stddata__2014_07_15/data/THCA/20140715/gdac.broadinstitute.org_THCA.Mutation_Packager_Calls.Level_3.2014071500.0.0.tar.gz
Broad Institute TCGA Genome Data Analysis Center	2014	Mutation data	http://gdac.broadinstitute.org/runs/stddata__2014_07_15/data/UCEC/20140715/gdac.broadinstitute.org_UCEC.Mutation_Packager_Calls.Level_3.2014071500.0.0.tar.gz
Broad Institute TCGA Genome Data Analysis Center	2014	Mutation data	http://gdac.broadinstitute.org/runs/stddata__2014_07_15/data/BLCA/20140715/gdac.broadinstitute.org_BLCA.Mutation_Packager_Calls.Level_3.2014071500.0.0.tar.gz
